# Supplementary material for: Specific site binding of metal ions on the intramolecular charge transfer fluorophore in micelles
Source: Royal Society of Chemistry journal article supplement (doi:10.1039/c3an00978e), 2013-01-01
Supplement: c3an00978e.pdf [file c3an00978e.pdf]

## Specific site binding of metal ions on the intramolecular charge transfer fluorophore in micelles

Saugata Sahu, Anasuya Mishra and G. Krishnamoorthy\*

Department of Chemistry  
Indian Institute of Technology Guwahati  
Guwahati 781039, India

### Supporting Information

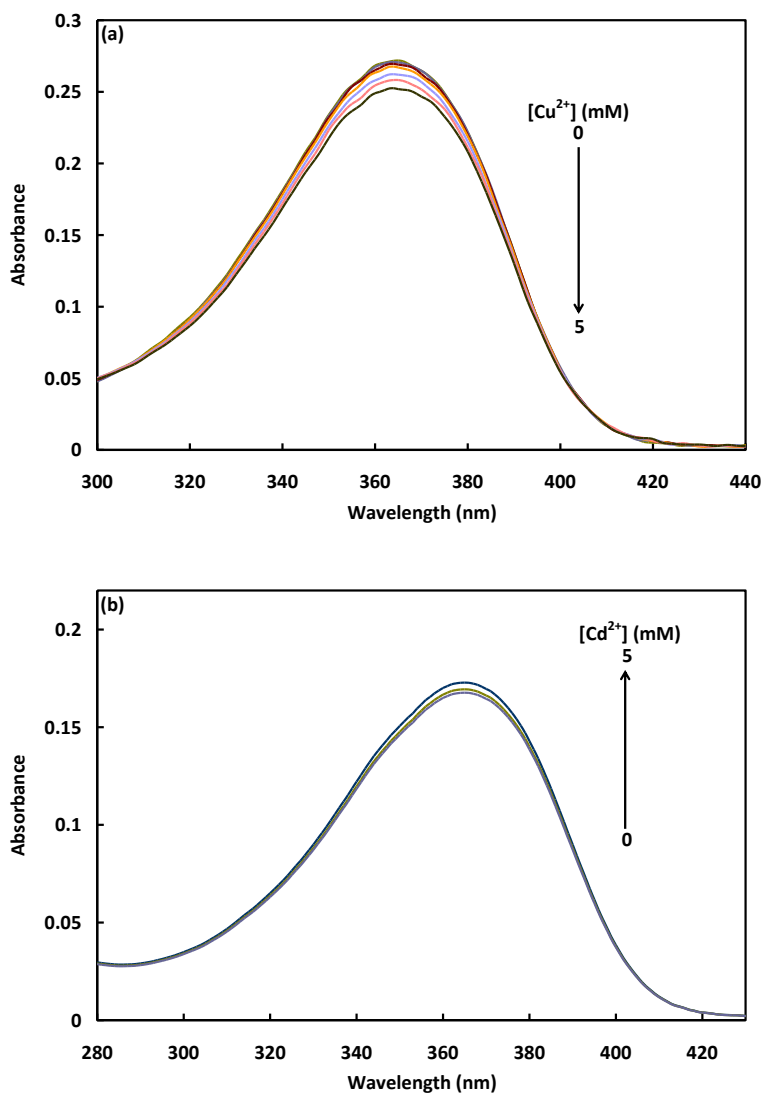

Figure S1: Absorption spectra of DMAPOP at different concentrations of (a)  $\text{Cu}^{2+}$  and (b)  $\text{Cd}^{2+}$  in water.

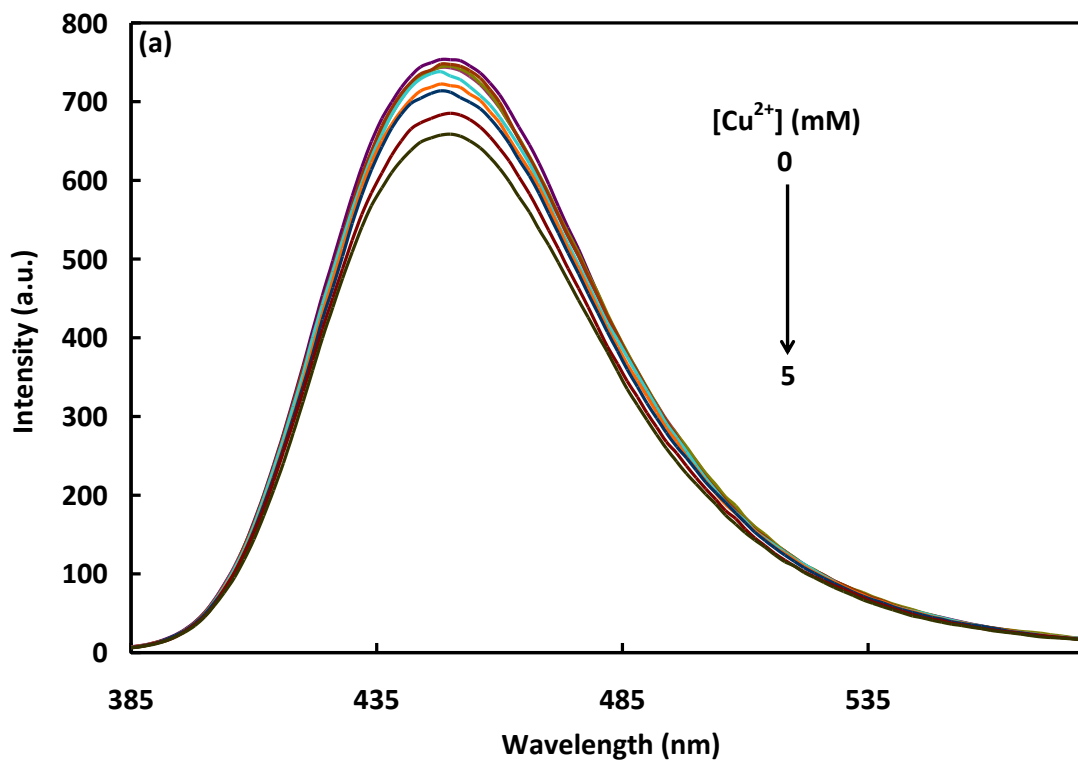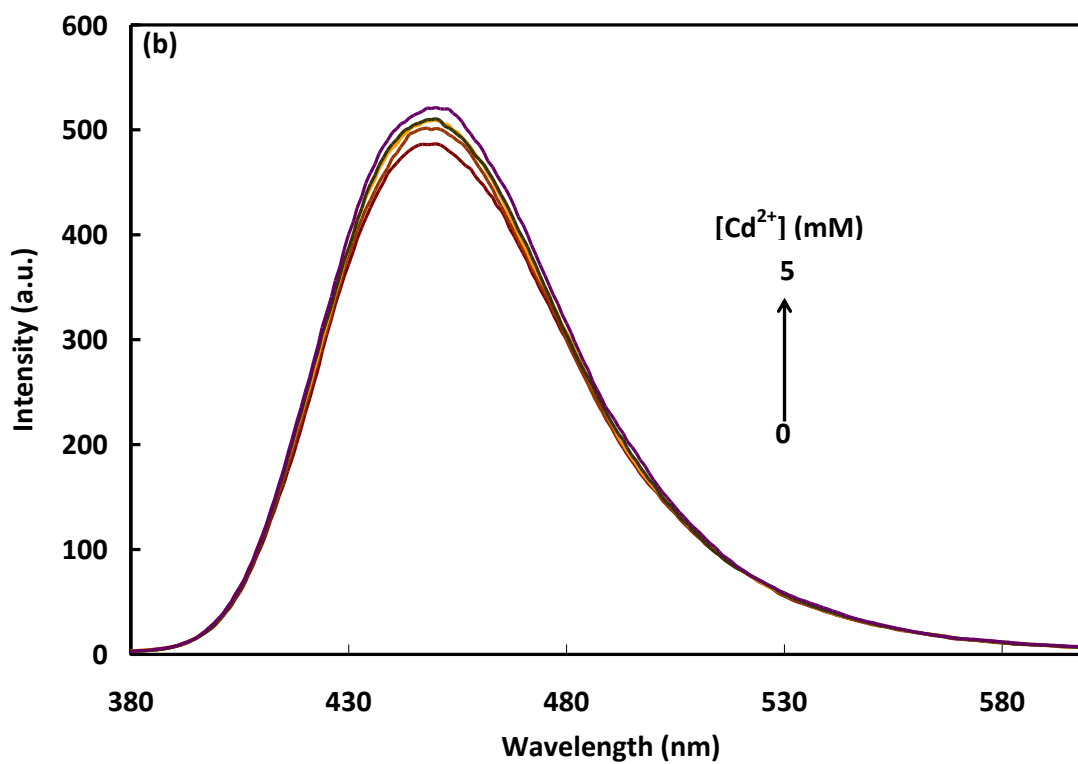

Figure S2: Fluorescence spectra of DMAPOP at different concentrations of (a)  $\text{Cu}^{2+}$  and (b)  $\text{Cd}^{2+}$  in water ( $\lambda_{\text{exc}} = 364 \text{ nm}$ ).
